# Supplementary material
Source: publisher figshare collection journal article supplement (https://tandf.figshare.com/ndownloader/files/15264347)
Supplement: Supplementary file 1 [file 15264347]

## **Antifungal activity of mongolian medicinal plant extracts**

Cristiano Giordani<sup>†A</sup>, Giovanna Simonetti<sup>†B</sup>, D. Natsagdorj<sup>C</sup>, G. Choijamts<sup>C</sup>, Francesca Ghirga<sup>D</sup>, Andrea Calcaterra<sup>E</sup>, Deborah Quaglio<sup>E</sup>, Giulia De Angelis<sup>F</sup>, Chiara Toniolo<sup>F</sup> and Gabriella Pasqua<sup>\*F</sup>

† These authors equally contributed to the work

\*Corresponding Author

<sup>A</sup> *Instituto de Fisica, Universidad de Antioquia, Calle 70 No. 52-21, Medellin, Colombia. Grupo Productos Naturales Marinos, Facultad de Ciencias Farmacéuticas y Alimentarias*

<sup>B</sup> *Department of Public Health and Infectious Diseases, Sapienza Università di Roma, P.le Aldo Moro 5, 00185 Rome, Italy*

<sup>C</sup> *Otoch Manramba University of Mongolia, P.O.Box. 49/235 Ulaanbaatar, Mongolia*

<sup>D</sup> *Center for Life Nano Science@Sapienza, Istituto Italiano di Tecnologia, Viale Regina Elena 291, 00161 Rome, Italy*

<sup>E</sup> *Department of Chemistry and Technology of Drugs “Department of excellence 2018-2022”, Sapienza Università di Roma, P.le Aldo Moro 5, 00185 Rome, Italy*

<sup>F</sup> *Department of Environmental Biology, Sapienza Università di Roma, P.le Aldo Moro 5, 00185 Rome, Italy*

## Abstract

The *in vitro* antifungal activity of extracts obtained from 14 medicinal plants of the mongolian flora were investigated by measuring their minimal inhibitory concentration (MIC) against fungi cause of cutaneous diseases such as *Candida* species, dermatophytes and *Malassezia furfur*. Among the species examined, *Stellaria dichotoma* L., *Scutellaria scordifolia* L. *Aquilegia sibirica* Fisch. Et Schrenk. and *Hyoscyamus niger* L. extracts demonstrated antifungal activity against all studied fungi. In particular, *S. scordifolia* L. methanol extract, obtained at room temperature, showed the best activity against *Candida* spp., *Malassezia furfur* and dermatophytes with GMMIC<sub>50</sub> values of 22 µg/mL, 64 µg/mL and 32 µg/mL, respectively. The flavones, luteolin and apigenin, identified in *S. scordifolia* extracts, and rutin identified in *S. dichotoma* and *Hyoscyamus niger* L. extracts, could be responsible of the observed antifungal activity.

## Keywords

Mongolian medicinal plants; methanol plant extracts; antifungal activity; minimal inhibitory concentration; *Candida species*; dermatophytes; *Malassezia furfur*.

## Experimental section

### *Plant materials and preparation of plant extracts*

The medicinal herbs (Table 1 in the main manuscript) were harvested in July in the Hentii botanical region of Mongolia and immediately put under vacuum in plastic bags. Systematic identification of all plants was authenticated by Professor Choijamts Gotov. The collected plant samples were chopped into small pieces and extracted with solvent at the Department of Chemistry and Technology of Drug (Sapienza, University of Rome). The extracts were obtained from the aerial part of the plant. Only for *Stellera chamaejasme* L. were used the roots. For the extraction process, the fresh plant materials were extracted using two different conditions.

Room temperature methanol extraction: a portion of each plant sample (100g) was transferred into a flask and extracted with methanol ( $3 \times 400$  mL) at room temperature ( $27 \pm 2$  °C) overnight. Hot methanol extraction: a portion of each plant sample (100g) was transferred into a flask and extracted with methanol (500 mL) at reflux temperature (64.7 °C) for 2h. In all cases, the collected methanol extracts were filtered through a buchner under vacuum through a Whatmann n. 1 filter paper and concentrated using a rotary evaporator (R-210, BÜCHI Labortechnik AG, Flawil, Switzerland) with the water bath set at 40°C. Acetone was added to each extract and evaporated *in vacuo* in order to remove water, until the obtainment of a solid residue. The powdered residues were transferred into appropriate containers, dried under high vacuum (RC-6, Vacuubrand, Wertheim, Germany) and stored at 4 °C in argon atmosphere before the analysis.

### **Antifungal susceptibility tests**

To evaluate the minimal inhibitory concentration (MIC), the susceptibility *in vitro* assay was performed according to CLSI standardized methods (CLSI. M38-A2, 2008; CLSI M27-A3, 2008; CLSI M27-S4, 2012). Antifungal susceptibility of *Candida* spp and *M. furfur* was determined according to standardized methods for yeast (CLSI M27-A3, 2008; CLSI, 2012; Simonetti et al. 2016) and antifungal susceptibility of dermatophytes was determined according to standardized methods for filamentous fungi (CLSI M27-A3, 2008; CLSI, 2012). In particular, *Candida* spp strains were grown on SAB at 35°C for 24h. *M. furfur* strains were grown on modified Dixon agar at 32 °C for 4 days. The final concentration of the inoculum was  $15 \times 10^6$  CFU/mL. Dermatophytes were grown on potato dextrose agar (Sigma Aldrich, St. Louis, Missouri, USA) at 28–30 °C until good conidial growth was present. The conidia suspension was prepared at final concentration of  $10^3$ – $3 \times 10^3$  CFU/mL (CLSI. M38-A2, 2008). The concentrations of extracts ranged from 256 µg/mL to 0.5 µg/mL. The MIC<sub>50</sub> was the lowest concentration of extracts that caused  $\geq 50\%$  growth inhibition; the MIC<sub>80</sub> was the lowest concentration that caused 80% growth inhibition, and the MIC<sub>100</sub> was the lowest extract concentration that inhibited 100% of growth.

## **Chemical analyses**

### ***Samples and reagents***

On the base of antifungal activity results, crude extracts from *Stellaria dichotoma* L., *Scutellaria scordifolia* L., *Aquilegia sibirica* and *Hyoscyamus niger* L. were selected to be analyzed by HPTLC.

Each plant extract was obtained using methanol (32213, Sigma Aldrich).

Dichloromethane, ethyl acetate, formic acid, acetic acid and methanol of HPLC grade were purchased from VWR International (Milan, Italy), and used as mobile phase. Chromatographic analysis was performed on HPTLC glass-backed plates (20 cm × 10 cm, 2 µm in thickness), silica gel 60 without fluorescence marker from Merck (Darmstadt, Germany). As derivatization solutions (for immersion), natural products reagent (1 g 2-Aminoethyl diphenylborinate was dissolved in 200 mL ethyl acetate) and anisaldehyde-sulfuric acid (10 mL of sulfuric acid are carefully added to an ice-cooled mixture of 170 mL methanol and 20 mL acetic acid, to this solution, 1 mL anisaldehyde is added) were prepared and used.

A CAMAG HPTLC system (Muttens, Switzerland) was used, comprising an applicator, Linomat 5 automatic sample spotter, Automatic Developing Chamber ADC2, TLC Visualizer, TLC Plate Heater III, TLC Scanner 3 and TLC Immersion Device. All instruments were controlled via the software platform 'WinCATS' 1.4.4 Planar Chromatography Manager (CAMAG).

### ***Chromatographic conditions***

The HPTLC plates were washed (pre-chromatography) with methanol and dried for 15 min at 120 °C prior to use. Samples were applied as bands of 7 mm in length, at a constant application rate of 150 nL/s, keeping the distance between adjacent bands as 9.4 mm. The extracts (30 mg/mL in ethanol) were analyzed in comparison with known polyphenols (e.g., chlorogenic acid, caffeic acid, gallic acid, apigenin, luteolin, catechin, kaempferol, quercetin and rutin).

Chromatography was performed in the Automated Developing Chamber ADC2 up to a migration distance of 70 mm (from the lower plate edge) using a mixture of ethyl acetate, dichloromethane, formic acid, acetic acid and water 100:25:10:10:11 (v/v) as mobile phase. The plate was dried for 3 min at 120 °C on TLC Plate Heater III. A post-chromatographic derivatization was performed with natural product reagent and anisaldehyde-sulfuric acid solution using a TLC Immersion Device (CAMAG) with an immersion speed of 3.5 cm/s and an immersion time of 1 s and heated on a TLC plate heater for 2 min at 120 °C. After every post-chromatographic derivatization plates were detected at TLC Visualizer under UV light (254 nm and 366 nm) and white light.

## References

1. CLSI. Clinical and Laboratory Standards Institute. 2008. Reference method for broth dilution antifungal susceptibility testing of filamentous fungi; Approved Standard—Second Edition M38–A2.
2. CLSI. Clinical and Laboratory Standards Institute. 2008. Reference method or broth dilution antifungal susceptibility testing of yeasts; Approved Standard—Third Edition M27–A3.
3. CLSI. Clinical and Laboratory Standards Institute. 2012. Reference method for broth dilution antifungal susceptibility testing of yeasts; Fourth Informational Supplement M27–S4.

**Table S1.** Antifungal activity of plant extracts against *C. albicans*, *C. krusei*, *C. parapsilosis* and *C. tropicalis*

| <i>C. albicans</i><br>ATCC10231 |            |     | <i>C. albicans</i><br>ATCC 90028 |     |     | <i>C. krusei</i><br>PMC0631 |     |     | <i>C. parapsilosis</i><br>DSM5784 |     |     | <i>C. tropicalis</i><br>DSM11953 |     |     |     |
|---------------------------------|------------|-----|----------------------------------|-----|-----|-----------------------------|-----|-----|-----------------------------------|-----|-----|----------------------------------|-----|-----|-----|
| Extracts                        | MIC(µg/mL) |     |                                  |     |     |                             |     |     |                                   |     |     |                                  |     |     |     |
|                                 | 50         | 90  | 100                              | 50  | 90  | 100                         | 50  | 90  | 100                               | 50  | 90  | 100                              | 50  | 90  | 100 |
| 3A                              | 256        | >   | >                                | 256 | >   | >                           | 128 | 256 | 256                               | 256 | >   | >                                | 256 | >   | >   |
| 3B                              | 256        | >   | >                                | 256 | >   | >                           | 64  | 128 | 256                               | 256 | >   | >                                | 128 | 256 | >   |
| 4A                              | 32         | 64  | 128                              | 64  | 128 | 256                         | 16  | 32  | 32                                | 32  | 64  | 128                              | 64  | 64  | 256 |
| 4B                              | 64         | 128 | 128                              | 64  | 128 | 256                         | 32  | 64  | 64                                | 64  | 128 | 256                              | 64  | 64  | 256 |
| 5A                              | >          | >   | >                                | 256 | >   | >                           | 128 | 256 | 256                               | >   | >   | >                                | 256 | >   | >   |
| 5B                              | >          | >   | >                                | 256 | >   | >                           | 128 | 256 | 256                               | >   | >   | >                                | 256 | >   | >   |
| 10A                             | >          | >   | >                                | >   | >   | >                           | 256 | >   | >                                 | >   | >   | >                                | 256 | >   | >   |
| 10B                             | 256        | >   | >                                | 256 | >   | >                           | 256 | >   | >                                 | >   | >   | >                                | 256 | 256 | >   |

Antifungal activity was determined according to Clinical and Laboratory Standards Institute guidelines. The values shown are the median from three independent determinations. MIC=

minimal inhibitory concentration. MIC<sub>50</sub>, MIC<sub>80</sub> and MIC<sub>100</sub>= lowest drug concentration that prevented 50%, 80% and 100% of growth with respect to the untreated control.

**Table S2.** Antifungal activity of plant extracts against *C. glabrata*

|          | <i>C. glabrata</i><br>PMC0840 |    |     | <i>C. glabrata</i><br>PMC0897 |     |     | <i>C. glabrata</i><br>PMC0850R |     |     | <i>C. glabrata</i><br>PMC08202 |     |     | <i>C. glabrata</i><br>PMC0807R |     |     |
|----------|-------------------------------|----|-----|-------------------------------|-----|-----|--------------------------------|-----|-----|--------------------------------|-----|-----|--------------------------------|-----|-----|
|          | MIC(μg/mL)                    |    |     |                               |     |     |                                |     |     |                                |     |     |                                |     |     |
| Extracts | 50                            | 90 | 100 | 50                            | 90  | 100 | 50                             | 90  | 100 | 50                             | 90  | 100 | 50                             | 90  | 100 |
| 3A       | 8                             | 16 | 32  | 128                           | 256 | >   | 32                             | 64  | 128 | 128                            | 256 | >   | 32                             | 128 | 256 |
| 3B       | 8                             | 16 | 32  | 128                           | 256 | >   | 32                             | 64  | 128 | 128                            | 256 | >   | 32                             | 128 | 256 |
| 4A       | 4                             | 8  | 16  | 64                            | 128 | 128 | 16                             | 16  | 32  | 16                             | 32  | 64  | 8                              | 32  | 64  |
| 4B       | 16                            | 32 | 64  | 128                           | 256 | 256 | 32                             | 64  | 128 | 128                            | 256 | 256 | 32                             | 128 | 256 |
| 5A       | 32                            | 64 | 64  | 256                           | >   | >   | 128                            | 128 | 256 | 256                            | >   | >   | 128                            | 256 | >   |
| 5B       | 16                            | 16 | 32  | 256                           | >   | >   | 128                            | 128 | 256 | 128                            | 256 | >   | 256                            | >   | >   |
| 10A      | 8                             | 16 | 32  | 256                           | 256 | >   | >                              | >   | >   | 128                            | 256 | >   | 256                            | >   | >   |
| 10B      | 8                             | 16 | 64  | 256                           | >   | >   | 128                            | 128 | 256 | 256                            | >   | >   | 128                            | 256 | >   |

Antifungal activity was determined according to Clinical and Laboratory Standards Institute guidelines. The values shown are the median from three independent determinations. MIC= minimal inhibitory concentration. MIC<sub>50</sub>, MIC<sub>80</sub> and MIC<sub>100</sub>= lowest drug concentration that prevented 50%, 80% and 100% of growth with respect to the untreated control

**Table S3.** Antifungal activity of plant extracts against *M. gypseum*, *T. mentagrophytes* and *Malassezia furfur*.

|          | <i>M.gypseum</i> DSM 3824 |     |     | <i>T. mentagrophytes</i> DSM4870 |     |     | <i>Malassezia furfur</i> DSM529 |     |     |
|----------|---------------------------|-----|-----|----------------------------------|-----|-----|---------------------------------|-----|-----|
|          | MIC( $\mu$ g/mL)          |     |     |                                  |     |     |                                 |     |     |
| Extracts | 50                        | 80  | 100 | 50                               | 80  | 100 | 50                              | 80  | 100 |
| 3A       | >                         | >   | >   | 256                              | >   | >   | 128                             | 128 |     |
| 3B       | >                         | >   | >   | 256                              | >   | >   | 128                             | 128 | 256 |
| 4A       | 32                        | 64  | 64  | 32                               | 32  | 64  | 64                              | 64  | 128 |
| 4B       | 64                        | 128 | 128 | 64                               | 64  | 128 | 128                             | 128 | 256 |
| 5A       | 256                       | 256 | 256 | 256                              | 256 | 256 | 128                             | 128 | 256 |
| 5B       | 256                       | >   | >   | 256                              | >   | >   | 128                             | 128 | 256 |
| 10A      | >                         | >   | >   | 256                              | >   | >   | 256                             | 256 | 256 |
| 10B      | >                         | >   | >   | 256                              | >   | >   | 128                             | 128 | 256 |

Antifungal activity was determined according to Clinical and Laboratory Standards Institute guidelines. The values shown are the median from three independent determinations. MIC= minimal inhibitory concentration. MIC<sub>50</sub>, MIC<sub>80</sub> and MIC<sub>100</sub>= lowest drug concentration that prevented 50%, 80% and 100% of growth with respect to the untreated control.

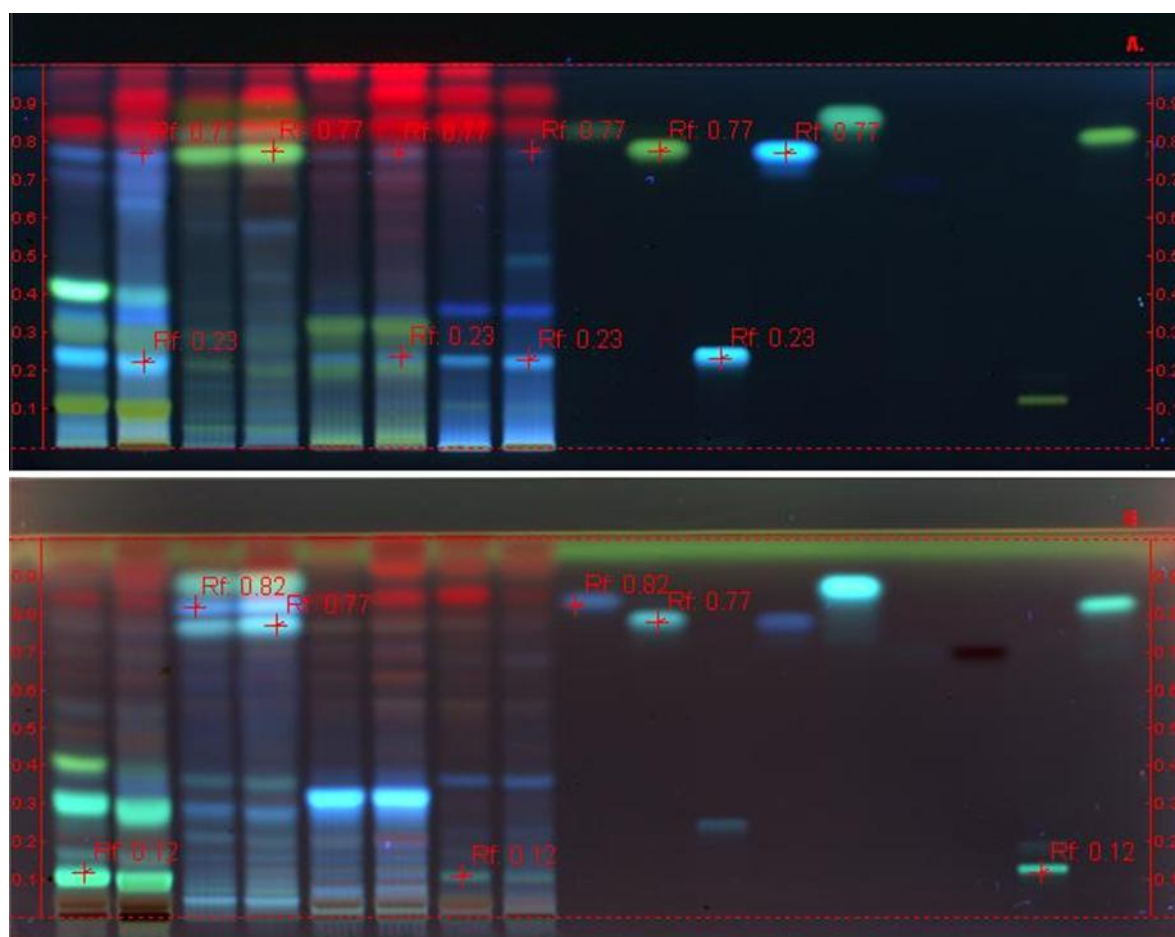

**Figure S1 a and S1 b.** HPTLC plates Tracks: 1. 3B; 2. 3A; 3. 4B; 4. 4A; 5. 5B; 6. 5A; 7. 10B; 8. 10 A; 9. Apigenin; 10. Luteolin; 11. Chlorogenic acid; 12. Caffeic acid; 13. Kaempferol; 14. Gallic acid; 15. Catechin; 16. Rutin; 17. Quercetin. a) Visualization, UV 366 nm, derivatization with natural product reagent. b) Visualization, UV 366 nm, derivatization with Natural Product reagent and anisaldehyde.

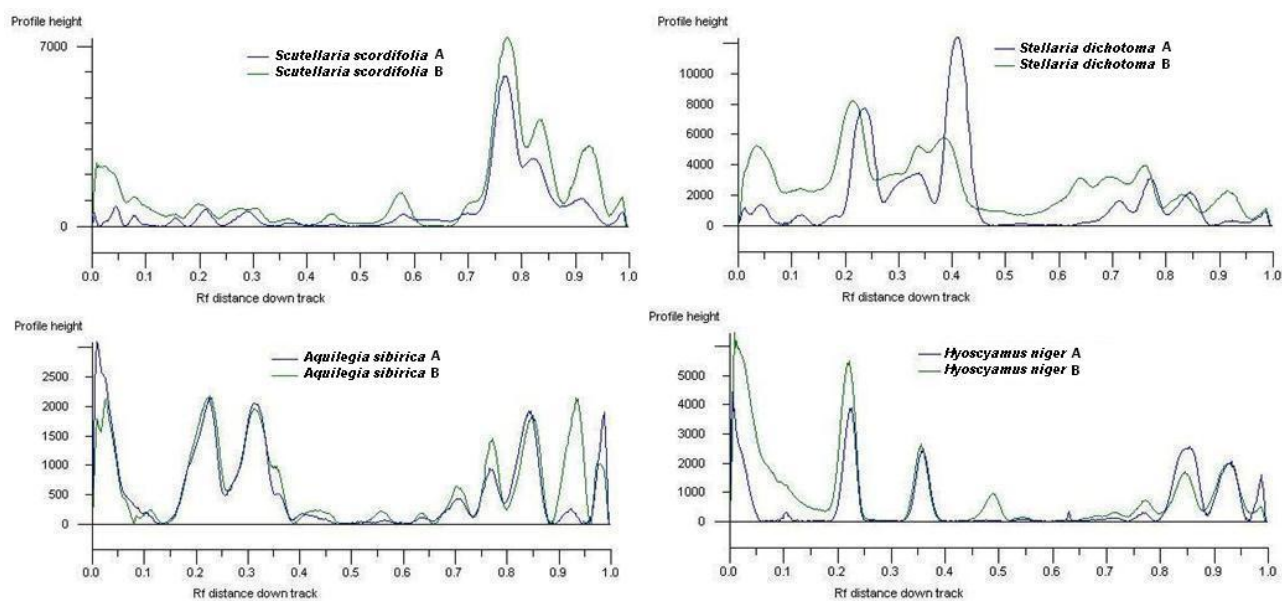

**Figure S2.** HPTLC chromatograms of *Stellaria dichotoma* L., *Scutellaria scordifolia* L., *Aquilegia sibirica* Fisch. Et Schrenk and *Hyoscyamus niger* L.
